# Supplementary material
Source: Royal Society of Chemistry journal article supplement (https://www.rsc.org/suppdata/books/184973/9781849738255/bk9781849738255.pdf)
Supplement: Supplementary file 1 [file bk9781849738255.pdf]

### **Note added after first publication**

This chapter replaces the version published in December 2014, which contained errors in the figure captions.
